# Supplementary material
Source: publisher figshare collection journal article supplement (https://gsapubs.figshare.com/ndownloader/files/23392718)
Supplement: Supplementary file 1 [file 23392718]

| **Supplementary Data Table 2: LA-ICPMS Hf isotope analyses** | | | | | | | | | | | | | |
| --- | --- | --- | --- | --- | --- | --- | --- | --- | --- | --- | --- | --- | --- |
| Sample -spot | Spot ID | Pb/Pb age | Measured 176Hf/177Hf | ± 1 se | 176Lu/177Hf | 176Yb/177Hf | 180Hf/177Hf | ± 1 se | Initial 176Hf/177Hf | Epsilon Hf(t) | ± 1 se | TDM(1)Ga | TDM(2) Ga |
| *Loch Shin inlier: Biotite schist sample RS-LSI-18-19; UK National Grid Reference NC 5208 1388* | | | | | | | | | | | | | |
| 1819 - 1 | s | 2480 | 0.281046 | 0.000015 | 0.000395 | 0.01676 | 1.88686 | 0.00004 | 0.281027 | -6.16 | 0.5 | 3.02 | 3.40 |
| 1819 - 2 | y | 1794 | 0.281644 | 0.000015 | 0.001793 | 0.08359 | 1.88679 | 0.00006 | 0.281583 | -2.10 | 0.5 | 2.30 | 2.62 |
| 1819 - 3 | y | 1970 | 0.281263 | 0.000015 | 0.000485 | 0.02076 | 1.88696 | 0.00004 | 0.281245 | -10.12 | 0.5 | 2.74 | 3.26 |
| 1819 - 4 | dy | 1831 | 0.281152 | 0.000019 | 0.000291 | 0.01232 | 1.88680 | 0.00005 | 0.281142 | -16.94 | 0.7 | 2.87 | 3.58 |
| 1819 - 5 | dy | 1747 | 0.281721 | 0.000018 | 0.000183 | 0.00630 | 1.88692 | 0.00006 | 0.281715 | 1.51 | 0.6 | 2.10 | 2.35 |
| 1819 - 6 | y | 1769 | 0.281655 | 0.000016 | 0.000036 | 0.00212 | 1.88702 | 0.00007 | 0.281654 | -0.16 | 0.5 | 2.18 | 2.47 |
| 1819 - 7 | s | 2448 | 0.281062 | 0.000012 | 0.000442 | 0.01828 | 1.88683 | 0.00006 | 0.281041 | -6.39 | 0.4 | 3.00 | 3.39 |
| 1819 - 8 | ds | 2369 | 0.281200 | 0.000025 | 0.000920 | 0.03700 | 1.88689 | 0.00009 | 0.281158 | -4.06 | 0.9 | 2.86 | 3.18 |
| 1819 - 9 | y | 1856 | 0.281802 | 0.000013 | 0.000939 | 0.04198 | 1.88694 | 0.00006 | 0.281769 | 5.91 | 0.4 | 2.03 | 2.15 |
| 1819 - 10 | di | 1707 | 0.281691 | 0.000021 | 0.001619 | 0.06830 | 1.88699 | 0.00007 | 0.281639 | -2.10 | 0.7 | 2.23 | 2.55 |
| *Loch Shin inlier: Felsic sheet sample RS-LSI-18-20; UK National Grid Reference NC 5190 1385* | | | | | | | | | | | | | |
| 1820 - 1 | i | 1732 | 0.281745 | 0.000012 | 0.000434 | 0.02310 | 1.88688 | 0.00006 | 0.281731 | 1.72 | 0.4 | 2.08 | 2.32 |
| 1820 - 2 | i | 1721 | 0.281742 | 0.000010 | 0.000139 | 0.00810 | 1.88687 | 0.00005 | 0.281737 | 1.72 | 0.3 | 2.07 | 2.32 |
| 1820 - 3 | i | 1740 | 0.281760 | 0.000011 | 0.000127 | 0.00794 | 1.88680 | 0.00004 | 0.281756 | 2.81 | 0.4 | 2.05 | 2.26 |
| 1820 - 4 | i | 1723 | 0.281706 | 0.000012 | 0.000246 | 0.01273 | 1.88701 | 0.00005 | 0.281698 | 0.36 | 0.4 | 2.13 | 2.40 |
| 1820 - 5 | i | 1766 | 0.281705 | 0.000009 | 0.000121 | 0.00684 | 1.88684 | 0.00003 | 0.281701 | 1.44 | 0.3 | 2.12 | 2.37 |
| 1820 - 6 | d | 1737 | 0.281732 | 0.000014 | 0.000410 | 0.01889 | 1.88698 | 0.00006 | 0.281719 | 1.40 | 0.5 | 2.10 | 2.35 |
| 1820 - 7 | i | 1754 | 0.281737 | 0.000014 | 0.000405 | 0.02238 | 1.88683 | 0.00006 | 0.281724 | 1.97 | 0.5 | 2.09 | 2.32 |
| 1820 - 8 | i | 1693 | 0.281776 | 0.000010 | 0.000201 | 0.01291 | 1.88690 | 0.00006 | 0.281770 | 2.22 | 0.4 | 2.03 | 2.26 |
| 1820 - 9 | d | 1283 | 0.281653 | 0.000014 | 0.000426 | 0.02434 | 1.88693 | 0.00005 | 0.281643 | -11.53 | 0.5 | 2.21 | 2.82 |
| 1820 - 10 | i | 1657 | 0.281740 | 0.000010 | 0.000173 | 0.01056 | 1.88691 | 0.00004 | 0.281735 | 0.17 | 0.4 | 2.08 | 2.37 |
| 1820 - 11 | i | 1707 | 0.281724 | 0.000014 | 0.000233 | 0.01163 | 1.88694 | 0.00006 | 0.281716 | 0.66 | 0.5 | 2.10 | 2.37 |
| 1820 - 12 | i | 1746 | 0.281800 | 0.000012 | 0.000146 | 0.00984 | 1.88680 | 0.00006 | 0.281795 | 4.32 | 0.4 | 1.99 | 2.17 |
| 1820 - 13 | i | 1693 | 0.281761 | 0.000015 | 0.000114 | 0.00742 | 1.88680 | 0.00004 | 0.281757 | 1.79 | 0.5 | 2.05 | 2.29 |
| 1820 - 14 | i | 1697 | 0.281789 | 0.000010 | 0.000225 | 0.01377 | 1.88694 | 0.00007 | 0.281782 | 2.74 | 0.4 | 2.01 | 2.23 |
| 1820 - 15 | d | 2064 | 0.281757 | 0.000013 | 0.000297 | 0.01303 | 1.88689 | 0.00005 | 0.281745 | 9.81 | 0.5 | 2.06 | 2.06 |
| 1820 - 16 | i | 1697 | 0.281725 | 0.000009 | 0.000150 | 0.00792 | 1.88693 | 0.00004 | 0.281720 | 0.55 | 0.3 | 2.10 | 2.37 |
| 1820 - 17 | i | 1735 | 0.281761 | 0.000012 | 0.000127 | 0.00792 | 1.88690 | 0.00005 | 0.281757 | 2.73 | 0.4 | 2.05 | 2.26 |
| 1820 - 18 | i | 1611 | 0.281737 | 0.000013 | 0.000172 | 0.00887 | 1.88693 | 0.00004 | 0.281732 | -0.98 | 0.4 | 2.08 | 2.40 |
| 1820 - 19 | i | 1732 | 0.281733 | 0.000009 | 0.000104 | 0.00637 | 1.88692 | 0.00005 | 0.281730 | 1.68 | 0.3 | 2.08 | 2.33 |
| 1820 - 20 | i | 1732 | 0.281758 | 0.000012 | 0.000163 | 0.01036 | 1.88692 | 0.00006 | 0.281753 | 2.50 | 0.4 | 2.05 | 2.27 |
| 1820 - 21 | d | 1548 | 0.281670 | 0.000011 | 0.000550 | 0.02460 | 1.88687 | 0.00003 | 0.281654 | -5.17 | 0.4 | 2.19 | 2.62 |
| 1820 - 22 | i | 1700 | 0.281776 | 0.000015 | 0.000173 | 0.00952 | 1.88683 | 0.00007 | 0.281770 | 2.42 | 0.5 | 2.03 | 2.26 |
| 1820 - 23 | i | 1672 | 0.281763 | 0.000014 | 0.000260 | 0.01229 | 1.88681 | 0.00004 | 0.281755 | 1.21 | 0.5 | 2.05 | 2.31 |
| *Swordly inlier: Intermediate orthogneiss sample RS-SI-18-13; UK National Grid Reference NC 7354 6355* | | | | | | | | | | | | | |
| 1813 - 1 | d | 1779 | 0.281897 | 0.000043 | 0.001133 | 0.05150 | 1.88692 | 0.00011 | 0.281859 | 7.35 | 1.5 | 1.91 | 2.00 |
| 1813 - 2 | p | 1253 | 0.282012 | 0.000018 | 0.000955 | 0.04580 | 1.88700 | 0.00005 | 0.281989 | 0.08 | 0.6 | 1.74 | 2.06 |
| 1813 - 3 | d | 1434 | 0.282026 | 0.000021 | 0.001280 | 0.06020 | 1.88695 | 0.00006 | 0.281991 | 4.23 | 0.7 | 1.74 | 1.93 |
| 1813 - 4 | d | 1283 | 0.282150 | 0.000013 | 0.000832 | 0.04082 | 1.88698 | 0.00005 | 0.282130 | 5.75 | 0.4 | 1.55 | 1.72 |
| 1813 - 5 | d | 2151 | 0.282147 | 0.000025 | 0.000998 | 0.05030 | 1.88686 | 0.00006 | 0.282106 | 24.63 | 0.9 | 1.56 | 1.16 |
| 1813 - 6 | p | 1655 | 0.281883 | 0.000011 | 0.001668 | 0.07770 | 1.88677 | 0.00005 | 0.281831 | 3.54 | 0.4 | 1.96 | 2.15 |
| 1813 - 7 | d | 1071 | 0.282121 | 0.000010 | 0.001790 | 0.09060 | 1.88688 | 0.00005 | 0.282085 | -0.61 | 0.4 | 1.63 | 1.96 |
| 1813 - 8 | d | 1633 | 0.282071 | 0.000020 | 0.002234 | 0.10820 | 1.88678 | 0.00006 | 0.282002 | 9.11 | 0.7 | 1.72 | 1.77 |
| 1813 - 9 | p | 1006 | 0.282101 | 0.000013 | 0.000859 | 0.04180 | 1.88694 | 0.00004 | 0.282085 | -2.08 | 0.4 | 1.62 | 2.00 |
| 1813 - 10 | p | 1050 | 0.282181 | 0.000011 | 0.002127 | 0.10630 | 1.88687 | 0.00006 | 0.282139 | 0.82 | 0.4 | 1.56 | 1.85 |
| 1813 - 11 | d | 1354 | 0.282044 | 0.000014 | 0.001168 | 0.05540 | 1.88693 | 0.00005 | 0.282014 | 3.23 | 0.5 | 1.71 | 1.93 |
| 1813 - 12 | p | 1165 | 0.282155 | 0.000012 | 0.000891 | 0.04350 | 1.88682 | 0.00006 | 0.282135 | 3.28 | 0.4 | 1.54 | 1.79 |
| 1813 - 13 | d | 1234 | 0.282153 | 0.000015 | 0.000993 | 0.04880 | 1.88672 | 0.00006 | 0.282130 | 4.63 | 0.5 | 1.55 | 1.75 |
| 1813 - 14 | d | 1550 | 0.282052 | 0.000014 | 0.001506 | 0.07350 | 1.88686 | 0.00006 | 0.282008 | 7.43 | 0.5 | 1.71 | 1.82 |
| 1813 - 15 | p | 960 | 0.282088 | 0.000012 | 0.001480 | 0.07500 | 1.88683 | 0.00004 | 0.282061 | -3.93 | 0.4 | 1.66 | 2.08 |
| 1813 - 16 | d | 1486 | 0.281982 | 0.000017 | 0.000932 | 0.04520 | 1.88684 | 0.00005 | 0.281956 | 4.14 | 0.6 | 1.78 | 1.98 |
| 1813 - 17 | d | 1428 | 0.282158 | 0.000020 | 0.001197 | 0.06130 | 1.88693 | 0.00007 | 0.282126 | 8.85 | 0.7 | 1.55 | 1.63 |
| 1813 - 18 | d | 1447 | 0.281957 | 0.000019 | 0.001196 | 0.05170 | 1.88699 | 0.00007 | 0.281924 | 2.14 | 0.7 | 1.83 | 2.08 |
| 1813 - 19 | d | 1195 | 0.282119 | 0.000015 | 0.000957 | 0.04740 | 1.88691 | 0.00006 | 0.282097 | 2.60 | 0.5 | 1.60 | 1.85 |
| *Achininver inlier: Felsic orthogneiss sample RS-TI-18-05; UK National Grid Reference NC 5725 6477* | | | | | | | | | | | | | |
| 1805 - 1 | i | 2724 | 0.281001 | 0.000017 | 0.000699 | 0.03059 | 1.88691 | 0.00006 | 0.280965 | -2.75 | 0.6 | 3.11 | 3.37 |
| 1805 - 2 | p | 2670 | 0.281125 | 0.000013 | 0.000929 | 0.04070 | 1.88689 | 0.00005 | 0.281078 | 0.03 | 0.4 | 2.96 | 3.16 |
| 1805 - 3 | d | 2216 | 0.281258 | 0.000050 | 0.000560 | 0.02070 | 1.88706 | 0.00010 | 0.281234 | -4.86 | 1.7 | 2.75 | 3.12 |
| 1805 - 4 | x | 2838 | 0.280800 | 0.000012 | 0.000748 | 0.03680 | 1.88693 | 0.00005 | 0.280759 | -7.42 | 0.4 | 3.38 | 3.76 |
| 1805 - 5 | d | 2568 | 0.281223 | 0.000013 | 0.001560 | 0.07610 | 1.88699 | 0.00008 | 0.281146 | 0.12 | 0.5 | 2.87 | 3.07 |
| 1805 - 6 | x | 2883 | 0.281101 | 0.000015 | 0.001741 | 0.07970 | 1.88691 | 0.00007 | 0.281005 | 2.38 | 0.5 | 3.05 | 3.17 |
| 1805 - 7 | p | 2641 | 0.281074 | 0.000012 | 0.000720 | 0.03279 | 1.88696 | 0.00006 | 0.281038 | -2.07 | 0.4 | 3.01 | 3.27 |
| 1805 - 8 | d | 2697 | 0.281072 | 0.000010 | 0.000974 | 0.04218 | 1.88690 | 0.00006 | 0.281022 | -1.33 | 0.4 | 3.03 | 3.26 |
| 1805 - 9 | i | 2740 | 0.281092 | 0.000016 | 0.000839 | 0.04011 | 1.88687 | 0.00006 | 0.281048 | 0.58 | 0.5 | 3.00 | 3.17 |
| 1805 - 10 | i | 2723 | 0.281072 | 0.000015 | 0.001538 | 0.06510 | 1.88691 | 0.00006 | 0.280992 | -1.80 | 0.5 | 3.08 | 3.31 |
| 1805 - 11 | i | 2733 | 0.281032 | 0.000013 | 0.000606 | 0.02705 | 1.88686 | 0.00005 | 0.281000 | -1.28 | 0.4 | 3.06 | 3.29 |
| 1805 - 12 | p | 2678 | 0.281171 | 0.000017 | 0.001613 | 0.07810 | 1.88707 | 0.00008 | 0.281088 | 0.60 | 0.6 | 2.95 | 3.13 |
| 1805 - 13 | d | 2491 | 0.281098 | 0.000027 | 0.000539 | 0.01810 | 1.88686 | 0.00007 | 0.281072 | -4.29 | 0.9 | 2.96 | 3.29 |
| 1805 - 14 | i | 2732 | 0.281003 | 0.000012 | 0.000352 | 0.01533 | 1.88687 | 0.00006 | 0.280985 | -1.86 | 0.4 | 3.08 | 3.32 |
| 1805 - 15 | i | 2756 | 0.281134 | 0.000014 | 0.000562 | 0.02290 | 1.88697 | 0.00007 | 0.281104 | 2.97 | 0.5 | 2.92 | 3.03 |
| 1805 - 16 | i | 2708 | 0.281155 | 0.000014 | 0.000577 | 0.02796 | 1.88701 | 0.00007 | 0.281125 | 2.59 | 0.5 | 2.89 | 3.02 |
| 1805 - 17 | d | 2417 | 0.281097 | 0.000016 | 0.000526 | 0.02277 | 1.88688 | 0.00006 | 0.281073 | -5.99 | 0.5 | 2.96 | 3.34 |
| 1805 - 18 | p | 2600 | 0.281040 | 0.000012 | 0.000868 | 0.03757 | 1.88688 | 0.00004 | 0.280997 | -4.46 | 0.4 | 3.07 | 3.39 |
| 1805 - 19 | p | 2622 | 0.281022 | 0.000014 | 0.000543 | 0.02231 | 1.88686 | 0.00005 | 0.280995 | -4.03 | 0.5 | 3.07 | 3.38 |
| 1805 - 20 | i | 2757 | 0.280987 | 0.000010 | 0.000400 | 0.01648 | 1.88681 | 0.00006 | 0.280966 | -1.94 | 0.4 | 3.10 | 3.35 |
| *Felsic clast in Moine basal conglomerate sample RS-TI-18-07; UK National Grid Reference NC 5740 6477* | | | | | | | | | | | | | |
| 1807 - 1 | p | 2657 | 0.281118 | 0.000012 | 0.000618 | 0.02840 | 1.88690 | 0.00005 | 0.281087 | 0.05 | 0.4 | 2.94 | 3.14 |
| 1807 - 2 | i | 2674 | 0.281090 | 0.000011 | 0.000492 | 0.02242 | 1.88688 | 0.00004 | 0.281065 | -0.34 | 0.4 | 2.97 | 3.18 |
| 1807 - 3 | i | 2695 | 0.281167 | 0.000013 | 0.001331 | 0.06250 | 1.88686 | 0.00007 | 0.281098 | 1.33 | 0.4 | 2.93 | 3.09 |
| 1807 - 4 | d | 2728 | 0.281205 | 0.000018 | 0.001140 | 0.05010 | 1.88684 | 0.00006 | 0.281145 | 3.79 | 0.6 | 2.86 | 2.96 |
| 1807 - 5 | i | 2714 | 0.281146 | 0.000016 | 0.000993 | 0.04377 | 1.88683 | 0.00010 | 0.281094 | 1.65 | 0.5 | 2.93 | 3.09 |
| 1807 - 6 | d | 3059 | 0.281120 | 0.000080 | 0.001000 | 0.03947 | 1.88699 | 0.00022 | 0.281061 | 8.49 | 2.8 | 2.97 | 2.91 |
| 1807 - 7 | i | 2699 | 0.281061 | 0.000014 | 0.000338 | 0.01475 | 1.88683 | 0.00008 | 0.281044 | -0.51 | 0.5 | 3.00 | 3.21 |
| 1807 - 8 | p | 2657 | 0.281123 | 0.000017 | 0.000579 | 0.02680 | 1.88693 | 0.00006 | 0.281094 | 0.30 | 0.6 | 2.93 | 3.13 |
| 1807 - 9 | i | 2722 | 0.281081 | 0.000014 | 0.000886 | 0.03820 | 1.88699 | 0.00006 | 0.281035 | -0.29 | 0.5 | 3.01 | 3.22 |
| 1807 - 10 | i | 2688 | 0.281063 | 0.000012 | 0.000350 | 0.01366 | 1.88690 | 0.00005 | 0.281045 | -0.71 | 0.4 | 3.00 | 3.22 |
| 1807 - 11 | i | 2686 | 0.281128 | 0.000012 | 0.000552 | 0.02602 | 1.88680 | 0.00004 | 0.281100 | 1.17 | 0.4 | 2.92 | 3.09 |
| 1807 - 12 | i | 2718 | 0.281105 | 0.000010 | 0.000652 | 0.02980 | 1.88681 | 0.00008 | 0.281071 | 0.90 | 0.4 | 2.96 | 3.14 |
| 1807 - 13 | d | 2856 | 0.281045 | 0.000012 | 0.001424 | 0.06450 | 1.88683 | 0.00007 | 0.280967 | 0.41 | 0.4 | 3.11 | 3.27 |
| 1807 - 14 | i | 2706 | 0.281131 | 0.000016 | 0.000818 | 0.03570 | 1.88694 | 0.00006 | 0.281089 | 1.26 | 0.5 | 2.94 | 3.10 |
| 1807 - 15 | x | 2851 | 0.280997 | 0.000014 | 0.000542 | 0.02033 | 1.88685 | 0.00005 | 0.280967 | 0.31 | 0.5 | 3.10 | 3.28 |
| 1807 - 16 | i | 2700 | 0.281093 | 0.000011 | 0.000498 | 0.02274 | 1.88690 | 0.00004 | 0.281067 | 0.35 | 0.4 | 2.97 | 3.16 |
| 1807 - 17 | i | 2675 | 0.281126 | 0.000015 | 0.000641 | 0.02889 | 1.88673 | 0.00007 | 0.281093 | 0.69 | 0.5 | 2.93 | 3.12 |
| 1807 - 18 | p | 2666 | 0.281130 | 0.000013 | 0.001272 | 0.05440 | 1.88691 | 0.00007 | 0.281065 | -0.52 | 0.5 | 2.98 | 3.19 |
| 1807 - 19 | i | 2758 | 0.281073 | 0.000013 | 0.000864 | 0.03630 | 1.88693 | 0.00004 | 0.281027 | 0.27 | 0.4 | 3.02 | 3.21 |
| 1807 - 20 | i | 2688 | 0.281146 | 0.000023 | 0.001324 | 0.05770 | 1.88699 | 0.00008 | 0.281078 | 0.46 | 0.8 | 2.96 | 3.14 |
| *Felsic clast in Moine basal conglomerate sample RS-TI-18-09; UK National Grid Reference NC 5725 6500* | | | | | | | | | | | | | |
| 1809 - 1 | x | 3540 | 0.280435 | 0.000012 | 0.000361 | 0.01540 | 1.88683 | 0.00004 | 0.280410 | -3.42 | 0.4 | 3.83 | 4.04 |
| 1809 - 2 | i | 2713 | 0.281006 | 0.000015 | 0.000938 | 0.04010 | 1.88679 | 0.00006 | 0.280957 | -3.25 | 0.5 | 3.12 | 3.40 |
| 1809 - 3 | p | 3398 | 0.280508 | 0.000015 | 0.000489 | 0.02361 | 1.88682 | 0.00006 | 0.280476 | -4.43 | 0.5 | 3.74 | 4.00 |
| 1809 - 4 | p | 2935 | 0.280778 | 0.000015 | 0.000201 | 0.00886 | 1.88689 | 0.00006 | 0.280767 | -4.88 | 0.5 | 3.36 | 3.67 |
| 1809 - 5 | i | 2733 | 0.281098 | 0.000011 | 0.000830 | 0.03890 | 1.88699 | 0.00006 | 0.281055 | 0.66 | 0.4 | 2.99 | 3.16 |
| 1809 - 6 | p | 2771 | 0.281109 | 0.000014 | 0.000938 | 0.04295 | 1.88695 | 0.00005 | 0.281059 | 1.72 | 0.5 | 2.98 | 3.13 |
| 1809 - 7 | p | 2658 | 0.281061 | 0.000012 | 0.000348 | 0.01462 | 1.88694 | 0.00005 | 0.281043 | -1.47 | 0.4 | 3.00 | 3.24 |
| 1809 - 8 | p | 3157 | 0.280575 | 0.000014 | 0.000341 | 0.01357 | 1.88684 | 0.00006 | 0.280554 | -7.27 | 0.5 | 3.64 | 3.99 |
| 1809 - 9 | i | 2745 | 0.280903 | 0.000018 | 0.001086 | 0.04940 | 1.88687 | 0.00006 | 0.280846 | -6.49 | 0.6 | 3.27 | 3.63 |
| 1809 - 10 | p | 2910 | 0.280978 | 0.000019 | 0.000849 | 0.03301 | 1.88685 | 0.00007 | 0.280931 | 0.37 | 0.6 | 3.15 | 3.32 |
| 1809 - 11 | i | 2755 | 0.280968 | 0.000012 | 0.000564 | 0.02222 | 1.88679 | 0.00006 | 0.280938 | -2.96 | 0.4 | 3.14 | 3.41 |
| 1809 - 12 | p | 2821 | 0.281087 | 0.000013 | 0.000469 | 0.02199 | 1.88685 | 0.00005 | 0.281062 | 2.97 | 0.4 | 2.97 | 3.08 |
| 1809 - 13 | i | 2761 | 0.281011 | 0.000012 | 0.000707 | 0.03226 | 1.88693 | 0.00005 | 0.280974 | -1.57 | 0.4 | 3.09 | 3.33 |
| 1809 - 14 | p | 2854 | 0.280976 | 0.000012 | 0.000632 | 0.02970 | 1.88684 | 0.00005 | 0.280941 | -0.54 | 0.4 | 3.13 | 3.33 |
| 1809 - 15 | i | 2712 | 0.281031 | 0.000017 | 0.001703 | 0.07030 | 1.88688 | 0.00007 | 0.280943 | -3.82 | 0.6 | 3.15 | 3.43 |
| 1809 - 16 | p | 2786 | 0.281014 | 0.000012 | 0.000876 | 0.03870 | 1.88696 | 0.00004 | 0.280967 | -1.20 | 0.4 | 3.10 | 3.32 |
| 1809 - 17 | p | 2919 | 0.281111 | 0.000013 | 0.002438 | 0.10323 | 1.88691 | 0.00006 | 0.280975 | 2.15 | 0.5 | 3.10 | 3.21 |
| 1809 - 18 | p | 2764 | 0.281039 | 0.000014 | 0.000360 | 0.01506 | 1.88697 | 0.00006 | 0.281020 | 0.14 | 0.5 | 3.03 | 3.22 |
| 1809 - 19 | i | 2746 | 0.281018 | 0.000013 | 0.000809 | 0.03300 | 1.88689 | 0.00005 | 0.280975 | -1.86 | 0.4 | 3.09 | 3.33 |
| 1809 - 20 | p | 2855 | 0.281165 | 0.000015 | 0.001773 | 0.08310 | 1.88684 | 0.00005 | 0.281068 | 3.98 | 0.5 | 2.97 | 3.04 |
| 1809 - 21 | p | 2814 | 0.280779 | 0.000012 | 0.000647 | 0.02999 | 1.88682 | 0.00006 | 0.280744 | -8.51 | 0.4 | 3.40 | 3.81 |
| 1809 - 22 | p | 2662 | 0.281104 | 0.000017 | 0.001820 | 0.07960 | 1.88694 | 0.00004 | 0.281011 | -2.52 | 0.6 | 3.06 | 3.31 |
| 1809 - 23 | p | 2802 | 0.281083 | 0.000011 | 0.000756 | 0.03452 | 1.88695 | 0.00006 | 0.281042 | 1.84 | 0.4 | 3.00 | 3.14 |
| 1809 - 24 | p | 2781 | 0.281036 | 0.000011 | 0.000714 | 0.03190 | 1.88700 | 0.00004 | 0.280998 | -0.25 | 0.4 | 3.06 | 3.26 |
| 1809 - 25 | p | 2905 | 0.281014 | 0.000014 | 0.000218 | 0.00872 | 1.88679 | 0.00007 | 0.281002 | 2.78 | 0.5 | 3.05 | 3.16 |
| 1809 - 26 | p | 2874 | 0.281015 | 0.000012 | 0.000319 | 0.01131 | 1.88693 | 0.00004 | 0.280997 | 1.89 | 0.4 | 3.06 | 3.19 |
| 1809 - 27 | i | 2714 | 0.280962 | 0.000011 | 0.000224 | 0.00841 | 1.88681 | 0.00006 | 0.280950 | -3.48 | 0.4 | 3.12 | 3.41 |
| 1809 - 28 | x | 3541 | 0.280468 | 0.000014 | 0.000457 | 0.02091 | 1.88682 | 0.00006 | 0.280437 | -2.44 | 0.5 | 3.79 | 3.98 |
| 1809 - 29 | i | 2702 | 0.281098 | 0.000014 | 0.001862 | 0.09064 | 1.88688 | 0.00006 | 0.281002 | -1.94 | 0.5 | 3.07 | 3.31 |
| 1809 - 30 | i | 2722 | 0.281075 | 0.000011 | 0.000457 | 0.02130 | 1.88690 | 0.00006 | 0.281051 | 0.29 | 0.4 | 2.99 | 3.18 |
| *Loch Shin inlier: Mafic orthogneiss sample RS-LSI-18-21; UK National Grid Reference NC 5207 1470* | | | | | | | | | | | | | |
| 1821 - 1 | d | 1793 | 0.281236 | 0.000011 | 0.000392 | 0.01548 | 1.88688 | 0.00005 | 0.281223 | -14.93 | 0.4 | 2.77 | 3.42 |
| 1821 - 2 | i | 1799 | 0.281318 | 0.000015 | 0.000647 | 0.02143 | 1.88686 | 0.00006 | 0.281296 | -12.18 | 0.5 | 2.68 | 3.26 |
| 1821 - 3 | d | 2127 | 0.281064 | 0.000012 | 0.000364 | 0.01380 | 1.88688 | 0.00006 | 0.281049 | -13.47 | 0.4 | 3.00 | 3.59 |
| 1821 - 4 | x | 2544 | 0.281028 | 0.000012 | 0.000285 | 0.01134 | 1.88688 | 0.00006 | 0.281014 | -5.15 | 0.4 | 3.04 | 3.39 |
| 1821 - 5 | i | 1668 | 0.281248 | 0.000012 | 0.000362 | 0.01337 | 1.88695 | 0.00006 | 0.281237 | -17.26 | 0.4 | 2.75 | 3.47 |
| 1821 - 6 | x | 2548 | 0.281095 | 0.000015 | 0.000869 | 0.04010 | 1.88698 | 0.00006 | 0.281053 | -3.69 | 0.5 | 2.99 | 3.30 |
| 1821 - 7 | d | 2273 | 0.281124 | 0.000016 | 0.000752 | 0.03081 | 1.88697 | 0.00004 | 0.281091 | -8.62 | 0.5 | 2.95 | 3.40 |
| 1821 - 8 | d | 2540 | 0.281055 | 0.000011 | 0.000287 | 0.01185 | 1.88676 | 0.00004 | 0.281041 | -4.28 | 0.4 | 3.00 | 3.33 |
| 1821 - 9 | i | 1799 | 0.281232 | 0.000011 | 0.000309 | 0.01124 | 1.88692 | 0.00006 | 0.281221 | -14.82 | 0.4 | 2.77 | 3.42 |
| 1821 - 10 | i | 1911 | 0.281105 | 0.000011 | 0.000293 | 0.01097 | 1.88679 | 0.00006 | 0.281094 | -16.80 | 0.4 | 2.94 | 3.63 |
| 1821 - 11 | d | 2609 | 0.281048 | 0.000013 | 0.000324 | 0.01230 | 1.88686 | 0.00006 | 0.281032 | -3.02 | 0.5 | 3.01 | 3.30 |
| 1821 - 12 | i | 1842 | 0.281289 | 0.000011 | 0.000247 | 0.00956 | 1.88690 | 0.00005 | 0.281280 | -11.77 | 0.4 | 2.69 | 3.26 |
| 1821 - 13 | d | 2591 | 0.281025 | 0.000013 | 0.000632 | 0.02620 | 1.88684 | 0.00007 | 0.280994 | -4.79 | 0.5 | 3.07 | 3.40 |
| 1821 - 14 | i | 1693 | 0.281226 | 0.000013 | 0.000392 | 0.01473 | 1.88717 | 0.00006 | 0.281213 | -17.52 | 0.5 | 2.78 | 3.51 |
| 1821 - 15 | i | 1786 | 0.281240 | 0.000013 | 0.000394 | 0.01543 | 1.88695 | 0.00006 | 0.281227 | -14.94 | 0.5 | 2.76 | 3.42 |
| 1821 - 16 | i | 1723 | 0.281252 | 0.000024 | 0.000484 | 0.01829 | 1.88676 | 0.00008 | 0.281236 | -16.03 | 0.8 | 2.75 | 3.44 |
| 1821 - 17 | i | 1714 | 0.281610 | 0.000016 | 0.000499 | 0.01910 | 1.88684 | 0.00007 | 0.281594 | -3.54 | 0.5 | 2.27 | 2.64 |
| 1821 - 18 | i | 1814 | 0.281248 | 0.000012 | 0.000408 | 0.01576 | 1.88680 | 0.00004 | 0.281234 | -14.04 | 0.4 | 2.75 | 3.38 |
| 1821 - 19 | i | 1754 | 0.281220 | 0.000010 | 0.000416 | 0.01602 | 1.88681 | 0.00006 | 0.281206 | -16.39 | 0.3 | 2.79 | 3.49 |
| 1821 - 20 | p | 2345 | 0.281156 | 0.000014 | 0.000485 | 0.02022 | 1.88698 | 0.00006 | 0.281134 | -5.46 | 0.5 | 2.88 | 3.25 |
| 1821 - 21 | i | 1751 | 0.281309 | 0.000014 | 0.000353 | 0.01365 | 1.88693 | 0.00007 | 0.281297 | -13.24 | 0.5 | 2.67 | 3.29 |
| 1821 - 22 | p | 2451 | 0.281066 | 0.000014 | 0.000493 | 0.01959 | 1.88678 | 0.00004 | 0.281043 | -6.26 | 0.5 | 3.00 | 3.39 |
| 1821 - 23 | i | 1751 | 0.281226 | 0.000012 | 0.000429 | 0.01584 | 1.88693 | 0.00005 | 0.281212 | -16.27 | 0.4 | 2.78 | 3.48 |
| *Achininver inlier: Intermediate orthogneiss sample RS-TI-18-10; UK National Grid Reference NC 5807 6410* | | | | | | | | | | | | | |
| 1810 - 1 | p | 2687 | 0.281080 | 0.000018 | 0.000580 | 0.02453 | 1.88698 | 0.00006 | 0.281050 | -0.55 | 0.6 | 2.99 | 3.21 |
| 1810 - 2 | d | 2740 | 0.281202 | 0.000015 | 0.000622 | 0.02930 | 1.88688 | 0.00005 | 0.281169 | 4.90 | 0.5 | 2.83 | 2.90 |
| 1810 - 3 | d | 2645 | 0.281132 | 0.000017 | 0.001508 | 0.06710 | 1.88697 | 0.00006 | 0.281056 | -1.34 | 0.6 | 2.99 | 3.22 |
| 1810 - 4 | p | 2714 | 0.281033 | 0.000011 | 0.000679 | 0.03052 | 1.88693 | 0.00005 | 0.280998 | -1.79 | 0.4 | 3.06 | 3.31 |
| 1810 - 5 | d | 2797 | 0.281066 | 0.000012 | 0.000240 | 0.01061 | 1.88677 | 0.00006 | 0.281053 | 2.09 | 0.4 | 2.98 | 3.12 |
| 1810 - 6 | p | 2576 | 0.281048 | 0.000012 | 0.001390 | 0.06340 | 1.88692 | 0.00006 | 0.280980 | -5.63 | 0.4 | 3.10 | 3.44 |
| *Glenelg-Attadale inlier, Western division: Mylonitic gneiss sample S96/41; UK National Grid Reference NG 912 226* | | | | | | | | | | | | | |
| 9641 - 1 |  | 2677 | 0.281013 | 0.000010 | 0.000202 | 0.00525 | 1.88656 | 0.00004 | 0.281003 | -2.48 | 0.4 | 3.05 | 3.32 |
| 9641 - 2 |  | 2677 | 0.281109 | 0.000012 | 0.001352 | 0.03520 | 1.88670 | 0.00004 | 0.281040 | -1.16 | 0.4 | 3.01 | 3.24 |
| 9641 - 3 |  | 2677 | 0.281041 | 0.000009 | 0.000373 | 0.01005 | 1.88674 | 0.00004 | 0.281022 | -1.80 | 0.3 | 3.03 | 3.28 |
| 9641 - 4 |  | 2677 | 0.281056 | 0.000010 | 0.000379 | 0.00964 | 1.88663 | 0.00004 | 0.281037 | -1.27 | 0.4 | 3.01 | 3.24 |
| 9641 - 5 |  | 2677 | 0.281010 | 0.000012 | 0.000226 | 0.00577 | 1.88662 | 0.00004 | 0.280998 | -2.63 | 0.4 | 3.06 | 3.33 |
| 9641 - 6 |  | 2677 | 0.281098 | 0.000009 | 0.000870 | 0.02211 | 1.88664 | 0.00004 | 0.281053 | -0.67 | 0.3 | 2.99 | 3.21 |
| 9641 - 7 |  | 2677 | 0.281162 | 0.000014 | 0.000486 | 0.01280 | 1.88657 | 0.00004 | 0.281137 | 2.30 | 0.5 | 2.87 | 3.02 |
| 9641 - 8 |  | 2677 | 0.281085 | 0.000011 | 0.000374 | 0.00924 | 1.88659 | 0.00004 | 0.281066 | -0.23 | 0.4 | 2.97 | 3.18 |
| 9641 - 9 |  | 2677 | 0.281136 | 0.000011 | 0.001111 | 0.03080 | 1.88667 | 0.00004 | 0.281079 | 0.24 | 0.4 | 2.96 | 3.15 |
| 9641 - 10 |  | 2677 | 0.281140 | 0.000011 | 0.000700 | 0.01910 | 1.88659 | 0.00004 | 0.281104 | 1.13 | 0.4 | 2.92 | 3.09 |
| 9641 - 11 |  | 2677 | 0.281094 | 0.000011 | 0.000226 | 0.00582 | 1.88665 | 0.00004 | 0.281082 | 0.36 | 0.4 | 2.95 | 3.14 |
| 9641 - 12 |  | 2677 | 0.281048 | 0.000010 | 0.000435 | 0.01233 | 1.88680 | 0.00005 | 0.281026 | -1.66 | 0.4 | 3.02 | 3.27 |
| 9641 - 13 |  | 2677 | 0.281026 | 0.000012 | 0.000383 | 0.01073 | 1.88671 | 0.00005 | 0.281006 | -2.35 | 0.4 | 3.05 | 3.31 |
| 9641 - 14 |  | 2677 | 0.281065 | 0.000008 | 0.000588 | 0.01675 | 1.88662 | 0.00006 | 0.281035 | -1.33 | 0.3 | 3.01 | 3.25 |
| 9641 - 15 |  | 2677 | 0.281039 | 0.000011 | 0.000194 | 0.00477 | 1.88661 | 0.00004 | 0.281029 | -1.54 | 0.4 | 3.02 | 3.26 |
| 9641 - 16 |  | 2677 | 0.281050 | 0.000018 | 0.000403 | 0.00998 | 1.88662 | 0.00004 | 0.281029 | -1.53 | 0.6 | 3.02 | 3.26 |
| 9641 - 17 |  | 2677 | 0.281033 | 0.000009 | 0.000663 | 0.01752 | 1.88666 | 0.00003 | 0.280999 | -2.61 | 0.3 | 3.06 | 3.33 |
| 9641 - 18 |  | 2677 | 0.281037 | 0.000010 | 0.000346 | 0.01006 | 1.88669 | 0.00004 | 0.281019 | -1.89 | 0.3 | 3.03 | 3.28 |
| *Ribigill inlier: Felsic orthogneiss sample S99/2; UK National Grid Reference NC 580 547* | | | | | | | | | | | | | |
| 99/2 - 1 |  | 2760 | 0.281047 | 0.000012 | 0.000322 | 0.00816 | 1.88655 | 0.00003 | 0.281030 | 0.42 | 0.4 | 3.02 | 3.20 |
| 99/2 - 2 |  | 2760 | 0.281104 | 0.000009 | 0.001530 | 0.04780 | 1.88663 | 0.00005 | 0.281023 | 0.17 | 0.3 | 3.03 | 3.22 |
| 99/2 - 3 |  | 2760 | 0.281104 | 0.000013 | 0.001193 | 0.03069 | 1.88656 | 0.00004 | 0.281041 | 0.81 | 0.4 | 3.01 | 3.17 |
| 99/2 - 4 |  | 2760 | 0.281056 | 0.000014 | 0.000707 | 0.01890 | 1.88655 | 0.00005 | 0.281019 | 0.01 | 0.5 | 3.03 | 3.23 |
| 99/2 - 5 |  | 2760 | 0.281015 | 0.000010 | 0.000136 | 0.00410 | 1.88659 | 0.00005 | 0.281008 | -0.37 | 0.3 | 3.04 | 3.25 |
| 99/2 - 6 |  | 2760 | 0.281041 | 0.000014 | 0.000515 | 0.01190 | 1.88661 | 0.00005 | 0.281014 | -0.16 | 0.5 | 3.04 | 3.24 |
| 99/2 - 7 |  | 2760 | 0.281096 | 0.000010 | 0.001122 | 0.03238 | 1.88666 | 0.00004 | 0.281037 | 0.66 | 0.4 | 3.01 | 3.18 |
| 99/2 - 8 |  | 2760 | 0.281063 | 0.000009 | 0.000424 | 0.01156 | 1.88668 | 0.00005 | 0.281041 | 0.79 | 0.3 | 3.00 | 3.18 |
| 99/2 - 9 |  | 2760 | 0.281030 | 0.000012 | 0.000184 | 0.00475 | 1.88666 | 0.00004 | 0.281020 | 0.07 | 0.4 | 3.03 | 3.22 |
| 99/2 - 10 |  | 2760 | 0.281048 | 0.000008 | 0.000300 | 0.00816 | 1.88665 | 0.00004 | 0.281032 | 0.49 | 0.3 | 3.01 | 3.19 |
| 99/2 - 11 |  | 2760 | 0.281050 | 0.000008 | 0.000588 | 0.01621 | 1.88654 | 0.00004 | 0.281019 | 0.02 | 0.3 | 3.03 | 3.22 |
| 99/2 - 12 |  | 2760 | 0.281049 | 0.000012 | 0.000718 | 0.01944 | 1.88652 | 0.00005 | 0.281011 | -0.26 | 0.4 | 3.04 | 3.24 |
| 99/2 - 13 |  | 2760 | 0.281021 | 0.000010 | 0.000142 | 0.00427 | 1.88656 | 0.00004 | 0.281013 | -0.17 | 0.3 | 3.04 | 3.24 |
| 99/2 - 14 |  | 2760 | 0.281045 | 0.000009 | 0.000255 | 0.00728 | 1.88658 | 0.00004 | 0.281032 | 0.47 | 0.3 | 3.01 | 3.20 |
| 99/2 - 15 |  | 2760 | 0.281027 | 0.000007 | 0.000259 | 0.00690 | 1.88668 | 0.00005 | 0.281013 | -0.18 | 0.2 | 3.04 | 3.24 |
| *Farr inlier: Intermediate gneiss sample S99/1; UK National Grid Reference NC 687 614* | | | | | | | | | | | | | |
| 99/1 - 1 |  | 2905 | 0.280945 | 0.000013 | 0.000390 | 0.01112 | 1.88651 | 0.00005 | 0.280923 | -0.01 | 0.4 | 3.16 | 3.34 |
| 99/1 - 2 |  | 2905 | 0.280972 | 0.000011 | 0.000336 | 0.00812 | 1.88659 | 0.00004 | 0.280953 | 1.05 | 0.4 | 3.12 | 3.27 |
| 99/1 - 3 |  | 2905 | 0.280978 | 0.000012 | 0.000781 | 0.02370 | 1.88662 | 0.00004 | 0.280935 | 0.39 | 0.4 | 3.14 | 3.31 |
| 99/1 - 4 |  | 2905 | 0.280977 | 0.000017 | 0.000825 | 0.02430 | 1.88669 | 0.00007 | 0.280931 | 0.26 | 0.6 | 3.15 | 3.32 |
| 99/1 - 5 |  | 2905 | 0.281010 | 0.000012 | 0.001152 | 0.03469 | 1.88657 | 0.00005 | 0.280946 | 0.79 | 0.4 | 3.13 | 3.29 |
| 99/1 - 6 |  | 2905 | 0.280970 | 0.000014 | 0.001049 | 0.03160 | 1.88663 | 0.00003 | 0.280912 | -0.43 | 0.5 | 3.18 | 3.36 |
| 99/1 - 7 |  | 2905 | 0.280959 | 0.000009 | 0.000548 | 0.01600 | 1.88661 | 0.00004 | 0.280928 | 0.17 | 0.3 | 3.15 | 3.33 |
| 99/1 - 8 |  | 2905 | 0.281003 | 0.000012 | 0.000869 | 0.02390 | 1.88674 | 0.00004 | 0.280955 | 1.10 | 0.4 | 3.12 | 3.27 |
| 99/1 - 9 |  | 2905 | *0.280960* | *0.000009* | *0.000584* | *0.01760* | *1.88660* | *0.00005* | 0.280927 | 0.14 | 0.3 | 3.15 | 3.33 |
| 99/1 - 10 |  | 2905 | *0.280924* | *0.000012* | *0.000628* | *0.01767* | *1.88663* | *0.00004* | 0.280889 | -1.23 | 0.4 | 3.20 | 3.42 |
| 99/1 - 11 |  | 2905 | 0.280952 | 0.000010 | 0.000405 | 0.01157 | 1.88660 | 0.00004 | 0.280929 | 0.21 | 0.4 | 3.15 | 3.32 |
| 99/1 - 12 |  | 2905 | 0.280945 | 0.000012 | 0.000477 | 0.01383 | 1.88673 | 0.00005 | 0.280918 | -0.19 | 0.4 | 3.16 | 3.35 |
| 99/1 - 13 |  | 2905 | 0.280919 | 0.000010 | 0.000711 | 0.02112 | 1.88666 | 0.00004 | 0.280879 | -1.58 | 0.4 | 3.22 | 3.44 |
| 99/1 - 14 |  | 2905 | 0.280980 | 0.000011 | 0.001034 | 0.03170 | 1.88661 | 0.00004 | 0.280922 | -0.04 | 0.4 | 3.16 | 3.34 |
| 99/1 - 15 |  | 2905 | 0.281024 | 0.000010 | 0.000756 | 0.02045 | 1.88667 | 0.00004 | 0.280982 | 2.07 | 0.3 | 3.08 | 3.20 |
| 99/1 - 16 |  | 2905 | 0.281029 | 0.000011 | 0.001463 | 0.04375 | 1.88667 | 0.00005 | 0.280948 | 0.85 | 0.4 | 3.13 | 3.28 |
| *Borgie inlier: Intermediate orthogneiss sample S96/12; UK National Grid Reference NC 689 573* | | | | | | | | | | | | | |
| 9612 - 1 |  | 2880 | 0.280987 | 0.000012 | 0.000311 | 0.00794 | 1.88660 | 0.00003 | 0.280970 | 1.06 | 0.4 | 3.09 | 3.25 |
| 9612 - 2 |  | 2880 | 0.281022 | 0.000013 | 0.000632 | 0.01709 | 1.88663 | 0.00004 | 0.280987 | 1.68 | 0.4 | 3.07 | 3.21 |
| 9612 - 3 |  | 2880 | 0.281030 | 0.000011 | 0.000687 | 0.01920 | 1.88661 | 0.00004 | 0.280992 | 1.85 | 0.4 | 3.07 | 3.20 |
| 9612 - 4 |  | 2880 | 0.281031 | 0.000009 | 0.000295 | 0.00764 | 1.88657 | 0.00006 | 0.281015 | 2.66 | 0.3 | 3.03 | 3.15 |
| 9612 - 5 |  | 2880 | 0.281051 | 0.000009 | 0.000961 | 0.02604 | 1.88663 | 0.00004 | 0.280998 | 2.06 | 0.3 | 3.06 | 3.19 |
| 9612 - 6 |  | 2880 | 0.281012 | 0.000012 | 0.000349 | 0.00882 | 1.88669 | 0.00004 | 0.280993 | 1.88 | 0.4 | 3.06 | 3.20 |
| 9612 - 7 |  | 2880 | 0.281036 | 0.000013 | 0.000336 | 0.00900 | 1.88665 | 0.00004 | 0.281017 | 2.76 | 0.5 | 3.03 | 3.14 |
| 9612 - 8 |  | 2880 | 0.281004 | 0.000010 | 0.000136 | 0.00388 | 1.88676 | 0.00006 | 0.280997 | 2.01 | 0.3 | 3.06 | 3.19 |
| 9612 - 9 |  | 2880 | 0.281030 | 0.000012 | 0.000390 | 0.00994 | 1.88670 | 0.00004 | 0.281008 | 2.44 | 0.4 | 3.04 | 3.16 |
| 9612 - 10 |  | 2880 | 0.281045 | 0.000009 | 0.000682 | 0.01872 | 1.88665 | 0.00006 | 0.281007 | 2.40 | 0.3 | 3.05 | 3.16 |
| 9612 - 11 |  | 2880 | 0.281046 | 0.000011 | 0.000527 | 0.01410 | 1.88675 | 0.00004 | 0.281017 | 2.74 | 0.4 | 3.03 | 3.14 |
| 9612 - 12 |  | 2880 | 0.281007 | 0.000011 | 0.000208 | 0.00494 | 1.88671 | 0.00005 | 0.280996 | 1.98 | 0.4 | 3.06 | 3.19 |
| 9612 - 13 |  | 2880 | 0.281039 | 0.000010 | 0.000376 | 0.00949 | 1.88679 | 0.00005 | 0.281018 | 2.79 | 0.3 | 3.03 | 3.14 |
| 9612 - 14 |  | 2880 | 0.281023 | 0.000010 | 0.000413 | 0.01056 | 1.88678 | 0.00004 | 0.281000 | 2.14 | 0.3 | 3.05 | 3.18 |
| 9612 - 15 |  | 2880 | 0.281004 | 0.000013 | 0.000246 | 0.00626 | 1.88674 | 0.00005 | 0.280990 | 1.79 | 0.5 | 3.07 | 3.20 |
| *Loch Fada inlier: Intermediate orthogneiss sample RS-MTZ-18-01; UK National Grid Reference NC 4388 5509* | | | | | | | | | | | | | |
| 1801 - 1 | i | 2812 | 0.280953 | 0.000012 | 0.000461 | 0.01225 | 1.88674 | 0.00005 | 0.280928 | -1.99 | 0.4 | 3.15 | 3.39 |
| 1801 - 2 | i | 2883 | 0.280953 | 0.000011 | 0.000451 | 0.01199 | 1.88673 | 0.00004 | 0.280928 | -0.35 | 0.4 | 3.15 | 3.34 |
| 1801 - 3 | z | 2795 | 0.280993 | 0.000010 | 0.000516 | 0.01341 | 1.88667 | 0.00004 | 0.280965 | -1.07 | 0.4 | 3.10 | 3.32 |
| 1801 - 4 | i | 2821 | 0.280984 | 0.000012 | 0.000598 | 0.01491 | 1.88671 | 0.00004 | 0.280952 | -0.96 | 0.4 | 3.12 | 3.33 |
| 1801 - 6 | i | 2805 | 0.280974 | 0.000011 | 0.000664 | 0.01790 | 1.88674 | 0.00005 | 0.280938 | -1.81 | 0.4 | 3.14 | 3.38 |
| 1801 - 7 | z | 2786 | 0.281005 | 0.000012 | 0.000835 | 0.02180 | 1.88673 | 0.00005 | 0.280960 | -1.45 | 0.4 | 3.11 | 3.34 |
| 1801 - 8 | z | 2768 | 0.280998 | 0.000012 | 0.000302 | 0.00767 | 1.88665 | 0.00006 | 0.280982 | -1.10 | 0.4 | 3.08 | 3.30 |
| 1801 - 9 | x | 2902 | 0.280963 | 0.000011 | 0.000305 | 0.00793 | 1.88672 | 0.00005 | 0.280946 | 0.74 | 0.4 | 3.13 | 3.29 |
| 1801 - 10 | z | 2779 | 0.280970 | 0.000009 | 0.000494 | 0.01273 | 1.88671 | 0.00005 | 0.280944 | -2.22 | 0.3 | 3.13 | 3.38 |
| 1801 - 11 | D | 2745 | 0.280987 | 0.000011 | 0.000556 | 0.01418 | 1.88681 | 0.00004 | 0.280958 | -2.51 | 0.4 | 3.11 | 3.37 |
| 1801 - 12 | i | 2813 | 0.280943 | 0.000012 | 0.000286 | 0.00765 | 1.88674 | 0.00005 | 0.280928 | -2.00 | 0.4 | 3.15 | 3.39 |
| 1801 - 13 | i | 2822 | 0.280933 | 0.000010 | 0.000242 | 0.00635 | 1.88673 | 0.00004 | 0.280920 | -2.07 | 0.3 | 3.16 | 3.41 |
| 1801 - 14 | i | 2881 | 0.280978 | 0.000010 | 0.000647 | 0.01710 | 1.88675 | 0.00003 | 0.280942 | 0.10 | 0.3 | 3.13 | 3.31 |
| 1801 - 15 | z | 2738 | 0.280989 | 0.000009 | 0.000603 | 0.01599 | 1.88678 | 0.00004 | 0.280957 | -2.67 | 0.3 | 3.12 | 3.38 |
| 1801 - 16 | i | 2807 | 0.280993 | 0.000010 | 0.000595 | 0.01552 | 1.88669 | 0.00004 | 0.280961 | -0.96 | 0.4 | 3.11 | 3.32 |
| 1801 - 17 | z | 2792 | 0.280959 | 0.000010 | 0.000377 | 0.01012 | 1.88680 | 0.00003 | 0.280939 | -2.09 | 0.3 | 3.14 | 3.38 |

Spot ID abbreviations as per Supplementary Data Table 1.
